# Supplementary material for: Mn tolerance in rice is mediated by MTP8.1, a member of the cation diffusion facilitator family
Source: PubMed Central journal article supplement (PMC3808320; doi:10.1093/jxb/ert243), 2013-08-20
Supplement: supp_ert243_jexbot098442_file001.pdf [file supp_ert243_jexbot098442_file001.pdf]

**Mn tolerance in rice is mediated by OsMTP8.1, a member of the cation  
diffusion facilitator family**

Zonghui Chen, Yumi Fujii, Naoki Yamaji, Sakine Masuda, Yuma Takemoto,  
Takehiro Kamiya, Yusufujiang Yusuyin, Kozo Iwasaki, Shin-ichiro Kato,  
Masayoshi Maeshima, Jian Feng Ma, Daisei Ueno

Supplementary materials

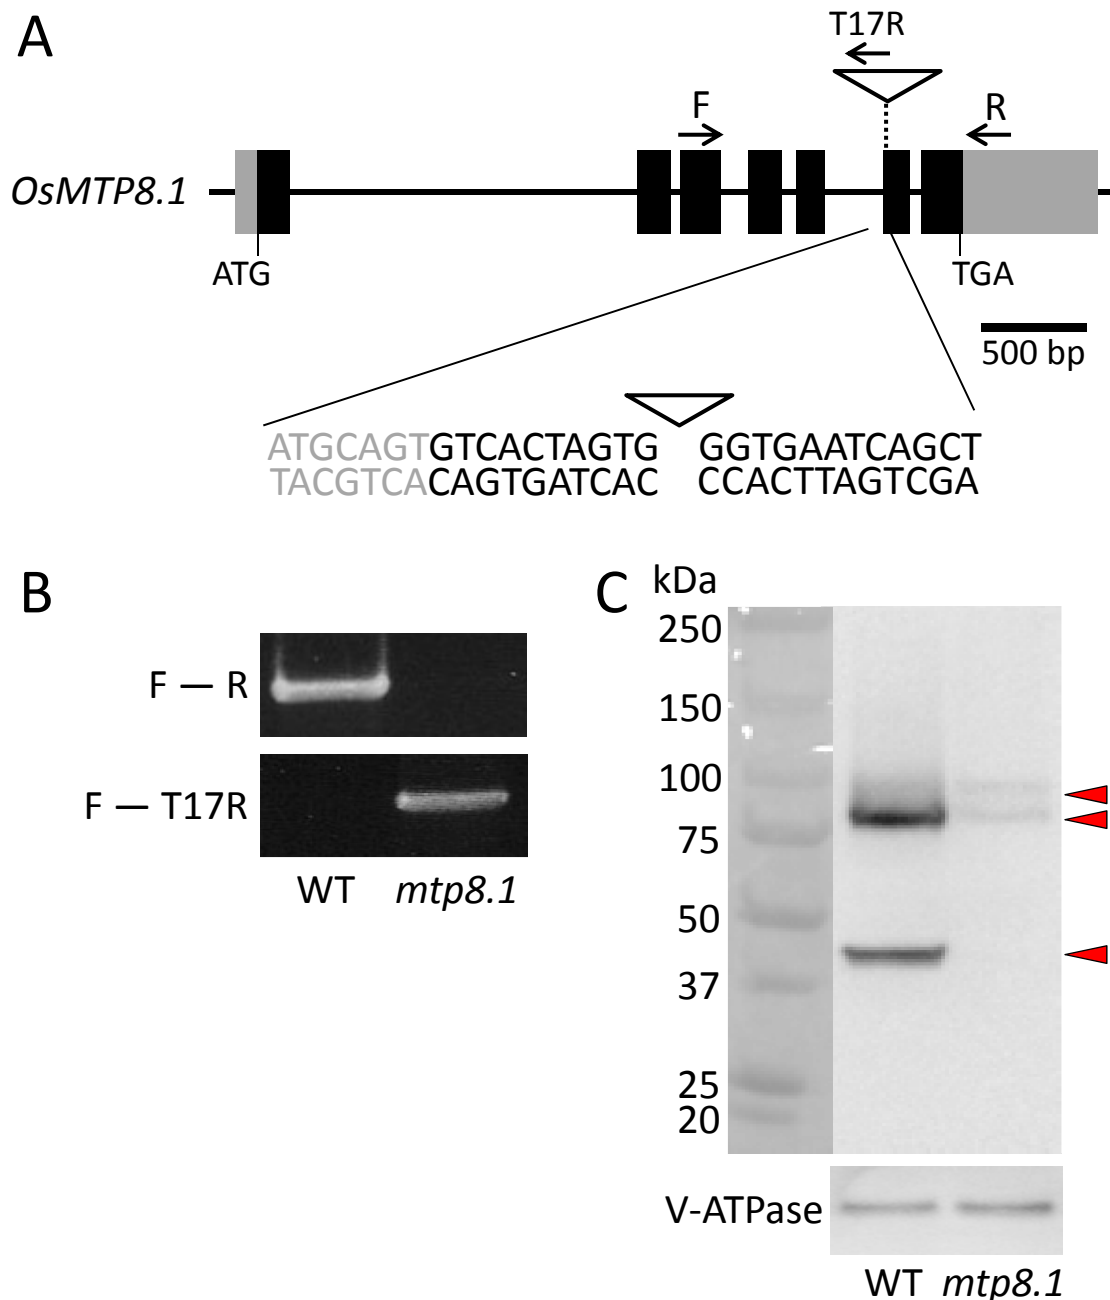

**Supplementary Figure S1. Analysis of Tos-17 insertion mutant**

(A) Localization of Tos-17 insertion in *osmtp8.1* mutant allele. Grey boxes, black boxes, and black lines indicate untranslated region, exon of coding region, and intron, respectively. Tos-17 is shown to be located on exon 6 by a triangle. Primers designed for *OsMTP8.1* (F and R) and Tos-17 (T17R) for genotyping are shown by horizontal arrows. The base sequence highlights around the site of Tos-17 insertion. Grey and black letters show intron and exon, respectively.

(B) Genotype of wild-type and *mtp8.1*. The PCR products amplified from genomic DNA using primers F-R or F-T17R are indicated.

(C) Western blot analysis of *OsMTP8.1* in microsomal membranes prepared from shoots of wild-type and *mtp8.1* rice lines. The tonoplast marker protein V-ATPase was detected using a specific antibody. The arrowhead indicates predicted OsMTP8.1.

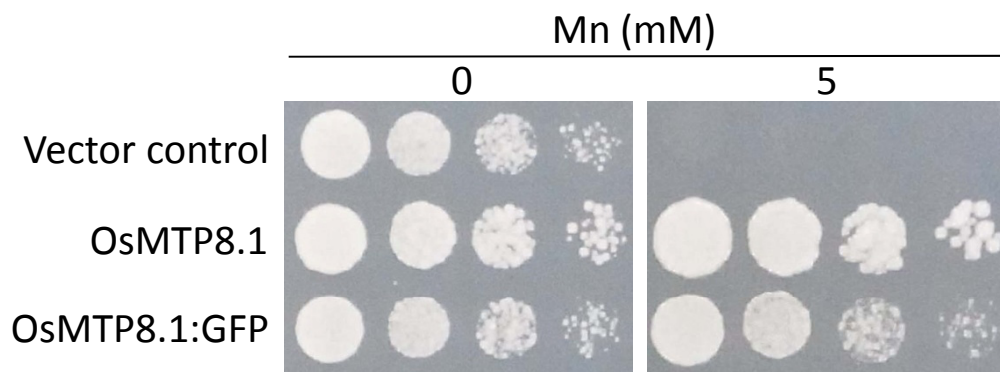

**Supplementary Figure S2.** Effect of *OsMTP8.1:GFP* expression on Mn tolerance in *S. cerevisiae*. The yeast mutant  $\Delta pmr1$  carrying the pYES2 empty vector, pYES2-*OsMTP8.1* or pYES2-*OsMTP8.1:GFP* were used. Five  $\mu\text{l}$  ( $\text{OD}_{600} = 2.0$ ) of serial dilutions (10-fold) were spotted onto SC-U/Gal medium with or without (control) supplementation with 5 mM  $\text{MnCl}_2$ . Plates were incubated for 48 h at 30 °C in the dark.

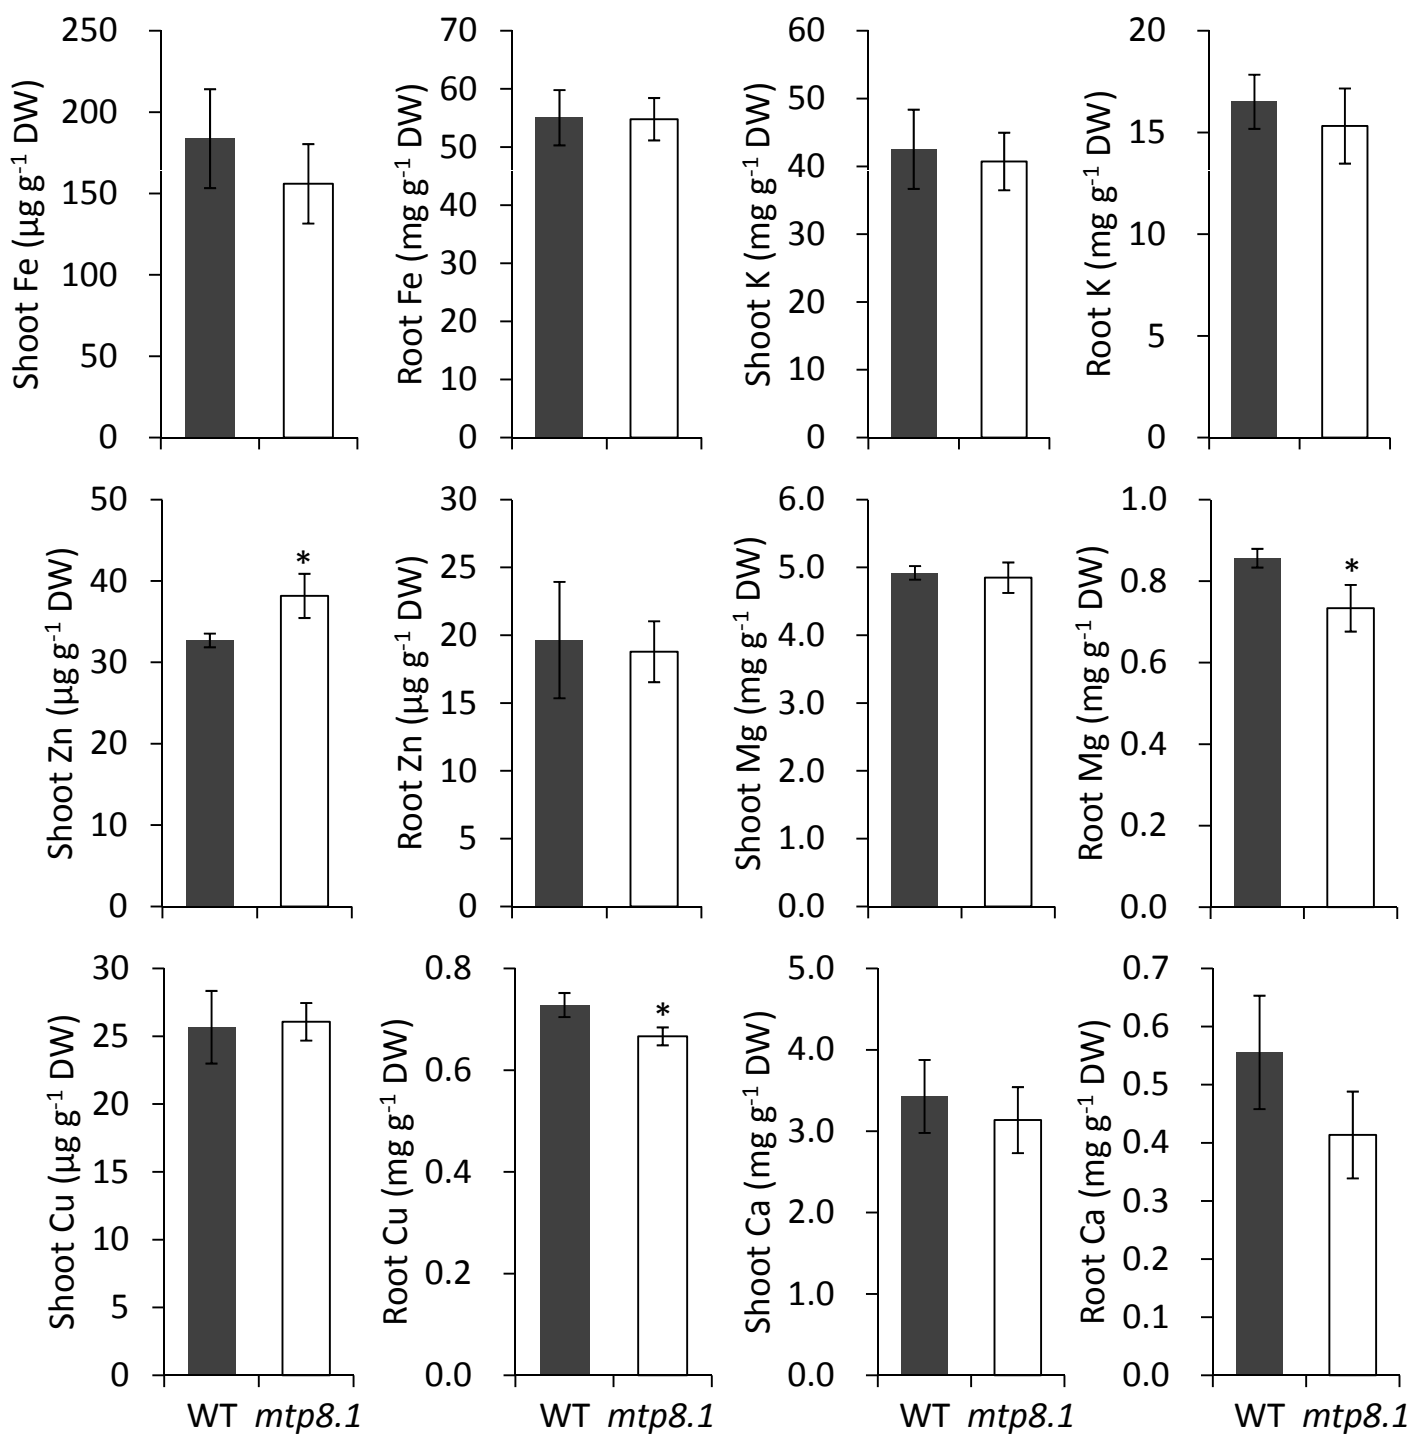

**Supplementary Figure S3.** Effect of *OsMTP8.1* knockout on the accumulation of microelements (Fe, Zn and Cu) and macroelements (K, Mg and Ca). Plants were hydroponically grown for 11 d in Kimura B and then for 10 d in a solution containing 200  $\mu\text{M}$  Mn. Data represent the mean  $\pm$  standard deviation (SD) ( $n = 4$ ). Significant differences between wild-type and *mtp8.1* were determined using Student's *t*-test are indicated by \* ( $P < 0.05$ )

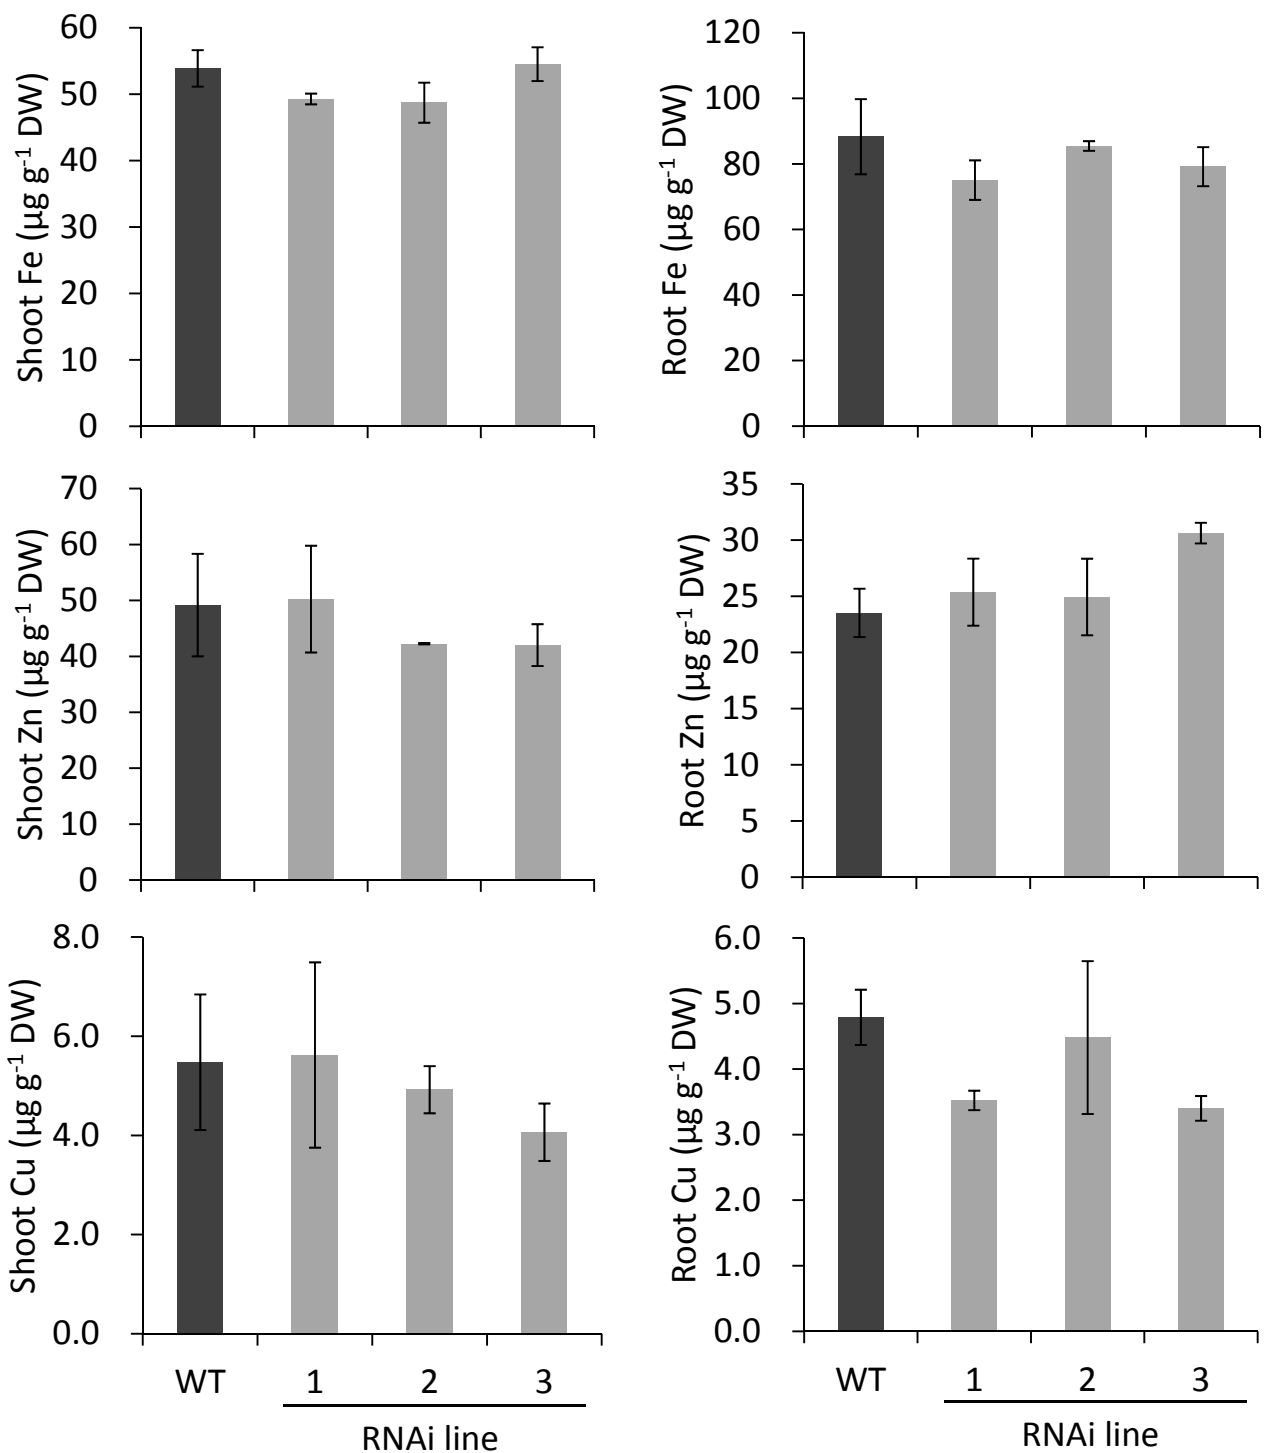

**Supplementary Figure S4.** Effect of *OsMTP8.1* knockdown in accumulation of Fe, Zn and Cu. Plants were hydroponically grown for 11 d in Kimura B and then for 10 d in a solution containing 200 μM Mn. Data represent the mean ± SD ( $n = 3-5$ ). Significant differences between wild-type and RNAi lines were calculated using Dunnett's test.

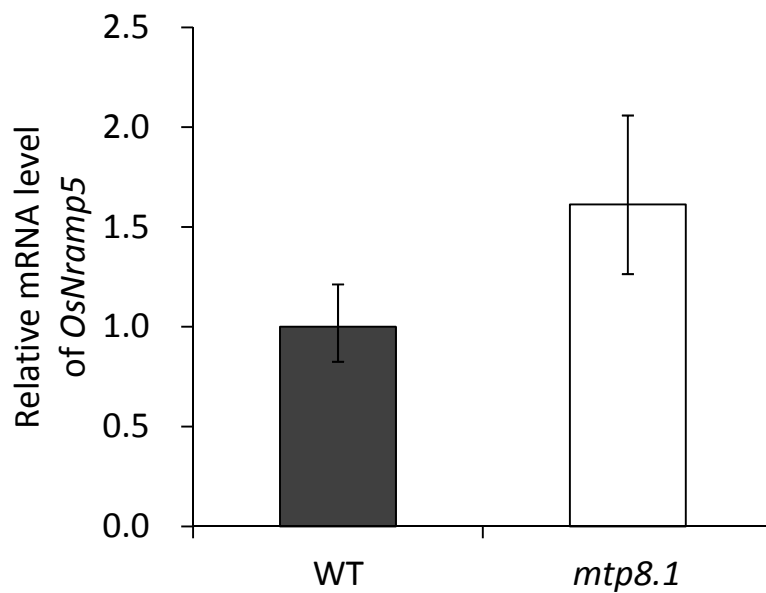

**Supplementary Figure S5.** Quantitative real time RT-PCR analysis of *OsNramp5* transcription in roots. Plants were hydroponically grown for 21 d and then for 12 d in a solution containing 200  $\mu$ M Mn. *Histone H3* was used as an internal control. Expression relative to wild-type is shown. Data represent the mean  $\pm$  SD ( $n = 4$ ).
